# Supplementary material for: Conformational flexibility of the oncogenic protein LMO2 primes the formation of the multi-protein transcription complex
Source: PubMed Central journal article supplement — Sci Rep. 2014 Jan 10;4:3643. doi: 10.1038/srep03643 (PMC3887373; doi:10.1038/srep03643), 2014-01-10
Supplement: srep03643-s1.pdf [file srep03643-s1.pdf]

**Conformational flexibility of the oncogenic protein LMO2 primes  
the formation of the multi-protein transcription complex**

H. Sewell, T. Tanaka, K. El Omari, E.J. Mancini, A. Cruz,

N. Fuentes-Fernandez, J. Chambers, T.H. Rabbitts

Supplementary Table one: Data Collection

|                                                                                            |                                                                                                         |
|--------------------------------------------------------------------------------------------|---------------------------------------------------------------------------------------------------------|
| <b>Data collection statistics</b>                                                          |                                                                                                         |
| Space group                                                                                | P6                                                                                                      |
| Unit cell Dimensions <i>a</i> , <i>b</i> , <i>c</i> (Å) <i>a</i> , <i>β</i> , <i>γ</i> (°) | <i>a</i> =124.3, <i>b</i> =124.3, <i>c</i> =81.4 and <i>α</i> =90.0° <i>β</i> = 90.0° <i>γ</i> = 120.0° |
| Resolution (Å)                                                                             | 50-(2.95-2.80)                                                                                          |
| Completeness (%)                                                                           | 99.8 (100)                                                                                              |
| Redundancy                                                                                 | 2.9(3.0)                                                                                                |
| <i>I</i> / <i>σ</i> ( <i>I</i> )                                                           | 10.8 (2.3)                                                                                              |
| Rmerge (%)                                                                                 | 10.9 (72.9)                                                                                             |
| <b>Refinement Statistics</b>                                                               |                                                                                                         |
| Resolution                                                                                 | 50.00-2.80                                                                                              |
| Number of reflections                                                                      | 16834                                                                                                   |
| Rwork/Rfree (%)                                                                            | 23.99/25.83                                                                                             |
| R.m.s.d. bond (Å)                                                                          | 0.005                                                                                                   |
| R.m.s.d. angle (°)                                                                         | 0.904                                                                                                   |
| Mean B-factor (Å <sup>2</sup> )                                                            | 75.405                                                                                                  |
| Molecules in the a.u.                                                                      | 2                                                                                                       |
| Ramachandran plot (%)                                                                      |                                                                                                         |
| Favored/allowed/outliers                                                                   | 93.7/5.56/0.74                                                                                          |

**Supplementary Table 2: Contacts of Structural Restraint**

| <b>Antibody region</b>              | <b>VH residue</b> | <b>LMO2 residue</b>                                       | <b>Interaction type</b>                                                           |
|-------------------------------------|-------------------|-----------------------------------------------------------|-----------------------------------------------------------------------------------|
| CDR1                                | His 31            | Arg 63                                                    | Charged groups                                                                    |
| Framework                           | Gln 39            | Phe 129<br>Cys 130                                        | Hydrogen bond<br>Charged groups                                                   |
| Framework<br>Former VH-VL interface | Leu 45            | Leu 117<br>Phe 120<br>Phe 120<br>Val 131                  | Hydrophobic<br>Hydrophobic<br>Hydrophobic<br>Hydrophobic                          |
| Framework<br>Former VH-VL interface | Trp 47            | Met 106<br>Leu 117                                        | Hydrophobic<br>Charged groups                                                     |
| CDR2                                | Tyr 50            | Cys 60<br>Met 106                                         | Hydrogen bond<br>Hydrophobic                                                      |
| CDR2                                | Tyr 53            | Asp 53                                                    | Hydrogen bond                                                                     |
| CDR2                                | Asn 54            | Asp 53                                                    | Hydrogen bond                                                                     |
| CDR2                                | Ser 57            | Leu 59<br>Cys 60<br>Gly 61                                | Charged groups<br>Charged groups<br>Hydrophobic                                   |
| Framework                           | Tyr 59            | Leu 59<br>Tyr 104                                         | Hydrogen bond<br>Hydrophobic                                                      |
| Framework                           | Tyr 95            | Val 131                                                   | Hydrophobic                                                                       |
| CDR3                                | Leu 100           | Arg 109 (also<br>contacts LID)                            | Hydrophobic                                                                       |
| CDR3                                | Thr 101           | Glu 66                                                    | Charged groups                                                                    |
| CDR3                                | Glu 102           | Cys 80<br>Arg 81<br>Arg 82                                | Charged groups<br>Charged groups<br>Hydrogen bond                                 |
| CDR3                                | Ser 103           | Cys 60<br>Asp 83<br>Asp 86 (hinge<br>region)              | Hydrogen bond<br>Hydrogen bond<br>Charged groups                                  |
| CDR3                                | Leu 104           | Leu 59<br>Tyr 104<br>Glu 105<br>Met 106<br>Thr 107        | Hydrophobic<br>Hydrophobic<br>Charged groups<br>Hydrophobic<br>Hydrogen bond      |
| CDR3                                | Glu 105           | Arg 82<br>Arg 86 (hinge)<br>Thr 107<br>Arg 109<br>Val 114 | Hydrophobic<br>Hydrogen bond<br>Charged groups<br>Hydrogen bond<br>Charged groups |
| CDR3                                | Leu 106           | Met 106<br>Thr 107<br>Met 108<br>Arg 109<br>Leu 117       | Hydrophobic<br>Charged groups<br>Hydrophobic<br>Hydrogen bond<br>Hydrophobic      |
| CDR3                                | Thr 107           | Arg 109                                                   | Hydrogen bond                                                                     |
| CDR3                                | Ala 108           | Val 110<br>Phe 120<br>Tyr 135                             | Charged groups<br>Hydrophobic<br>Hydrophobic                                      |
| CDR3                                | Trp 110           | Phe 120<br>Cys 130<br>Val 131                             | Hydrophobic<br>Hydrophobic<br>Hydrophobic                                         |

|           |         |                               |                                                |
|-----------|---------|-------------------------------|------------------------------------------------|
|           |         | Gly 132<br>Asp 133<br>Tyr 135 | Charged groups<br>Hydrogen bond<br>Hydrophobic |
| Framework | Trp 114 | Met 108<br>Val 131            | Hydrophobic<br>Hydrophobic                     |

### Hydrogen bonds

[XML](#)

| ## | Structure 1      | Dist. [Å] | Structure 2      |
|----|------------------|-----------|------------------|
| 1  | C:GLN 39[ NE2 ]  | 3.35      | A:PHE 129[ O ]   |
| 2  | C:TYR 50[ OH ]   | 2.66      | A:CYS 60[ O ]    |
| 3  | C:TYR 53[ OH ]   | 3.44      | A:ASP 53[ OD1 ]  |
| 4  | C:TYR 53[ OH ]   | 3.09      | A:ASP 53[ O ]    |
| 5  | C:ASN 54[ ND2 ]  | 3.65      | A:ASP 53[ O ]    |
| 6  | C:ASN 54[ ND2 ]  | 3.86      | A:SER 56[ OG ]   |
| 7  | C:TYR 59[ OH ]   | 2.61      | A:LEU 59[ O ]    |
| 8  | C:SER 103[ N ]   | 3.36      | A:CYS 60[ SG ]   |
| 9  | C:SER 103[ OG ]  | 2.57      | A:ASP 83[ OD1 ]  |
| 10 | C:LEU 106[ N ]   | 2.73      | A:THR 107[ O ]   |
| 11 | C:THR 107[ OG1 ] | 3.04      | A:ARG 109[ O ]   |
| 12 | C:ALA 108[ N ]   | 3.43      | A:ARG 109[ O ]   |
| 13 | C:ALA 108[ N ]   | 3.58      | A:MET 108[ SD ]  |
| 14 | C:TRP 110[ NE1 ] | 2.97      | A:ASP 133[ O ]   |
| 15 | C:GLU 102[ OE1 ] | 3.10      | A:ARG 82[ N ]    |
| 16 | C:LEU 104[ O ]   | 3.53      | A:THR 107[ N ]   |
| 17 | C:LEU 104[ O ]   | 3.32      | A:THR 107[ OG1 ] |
| 18 | C:GLU 105[ OE1 ] | 3.81      | A:ARG 109[ NE ]  |
| 19 | C:GLU 105[ OE2 ] | 3.13      | A:ARG 86[ NH1 ]  |
| 20 | C:LEU 106[ O ]   | 2.75      | A:ARG 109[ N ]   |
| 21 | C:ALA 108[ O ]   | 3.32      | A:TYR 135[ OH ]  |

### Salt bridges

[XML](#)

| ## | Structure 1      | Dist. [Å] | Structure 2     |
|----|------------------|-----------|-----------------|
| 1  | C:GLU 105[ OE1 ] | 3.81      | A:ARG 109[ NE ] |
| 2  | C:GLU 105[ OE2 ] | 3.13      | A:ARG 86[ NH1 ] |

No disulfide bonds found  
No covalent bonds found

Supplementary Figure S1.

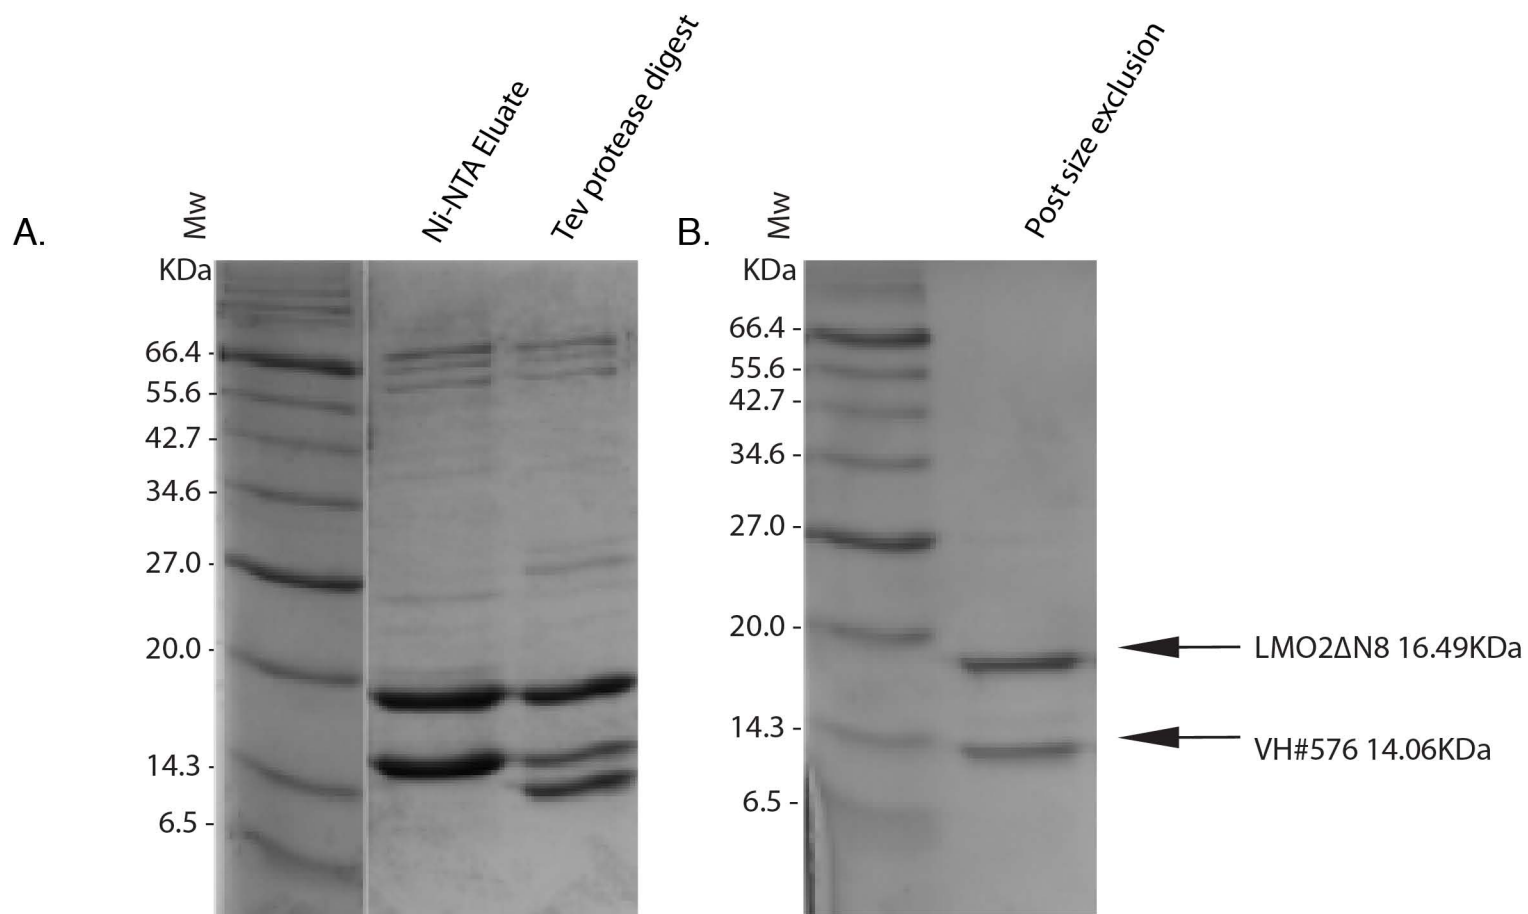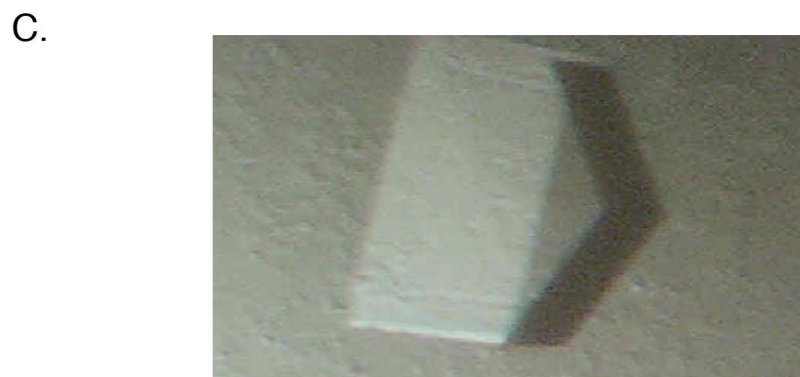

### **Purification and crystallisation of anti-LMO2 VH576 and LMO2**

(A) LMO2 and VH#576 were co-purified using Nickel agarose chromatography. The protein purity was analysed by 15% SDS-PAGE, stained with Coomassie Brilliant Blue, pre and post digestion with his-tagged Tobacco Etch virus protease.

(B) The protein purity was again assessed after gel filtration chromatography with a Hi-Load Superdex 75 column.

(C) The microscope image shows a crystal grown by sitting drop vapour diffusion, Greiner 96 well plate and reagent 100mM MES monohydrate pH 6.0, 0.8 M ammonium sulphate with additive: 1,3 Butanediol. The drop consisted of 200nl VH576/LMO2 at 8mg/ml, 100nl reagent and 100nl additive. The reservoir (100µl) reagent was at a dilution of 90%. The hexagonal, plate shaped crystal, measured 100µm by 40µm

## Supplementary Figure 2

### A. Amino Acid sequence of anti-LMO2 VH protein

```
      1          10          20          30 CDR1      40
GGMAEVQLLES GGLVQP GGLRLS CAASGF SFS HSPMN WVRQAPGKG
      50 CDR2      60          70          80          90
LEWVS YISYNSS IYYADS VKGR FTISR DNSKNTLY LQMNSLRAEDTAV
      100 CDR3     110          120
YYCAR GLTESLE LTADWFDY WGQGT LVTVSS
```

Footnote: The CDR residues are highlighted in yellow and the key CDR amino acids determined by mutagenesis (see main text figure 2) are shown in red.

### B. Amino Acid sequence of LMO2 $\Delta$ N8 protein

```
      10          20          30          40          50
SLDPSEEPVDEVLQIPPSLLT CGGC QQNIGDRYFLKAIDQYWHED CLSC
      60          70          80          90          100
DL CGCRLG EVGRR LYYKLGRKLCRRDYLRLFGQDGLCASC DKRIRAYEM
      110          120          130          140          150
TMRVKDKVYHLECFKCAACQKHFCVGD RYLLINS DIVCEQDIYEWTKIN
158
GMI
```

Footnote: The LMO2 $\Delta$ N8 lacks the first eight amino acids of the mature protein (MSSAIERK).

The zinc binding residues are highlighted in yellow (LIM1 domain) or grey (LIM2 domain).

The anti-parallel beta sheets of LMO2 (when in complex with LDB1-LID) are highlighted in green.

Supplementary Figure S3

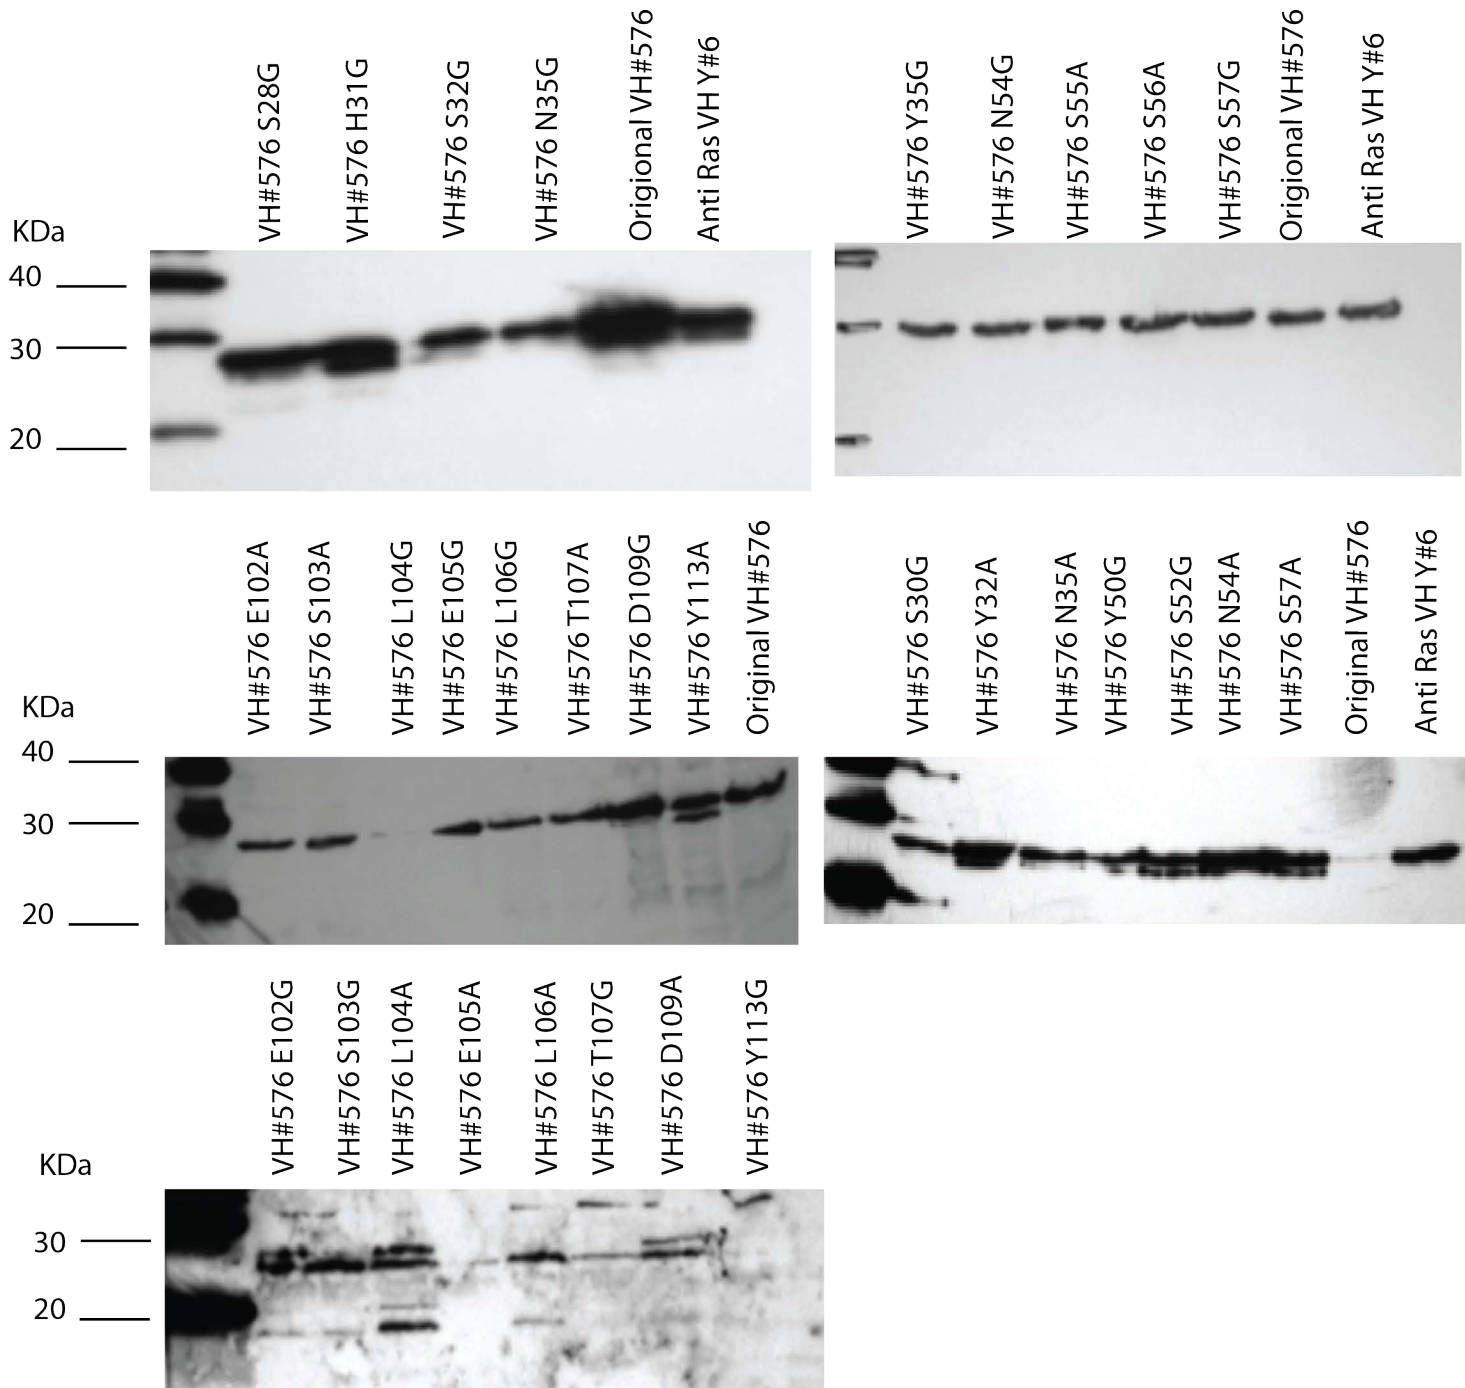

### Western blot analysis of mutated versions of VH#576

Anti-VP16 Western blot analysis was employed to analyse the prey (VH#576-VP16) expression levels. All mutated versions of VH#576 were expressed, except for the L104G, E105A, Y113G mutated forms. All blots, except the final panel, show a positive control of the original VH#576 and/or VHY#6.



## Supplementary Figure 4

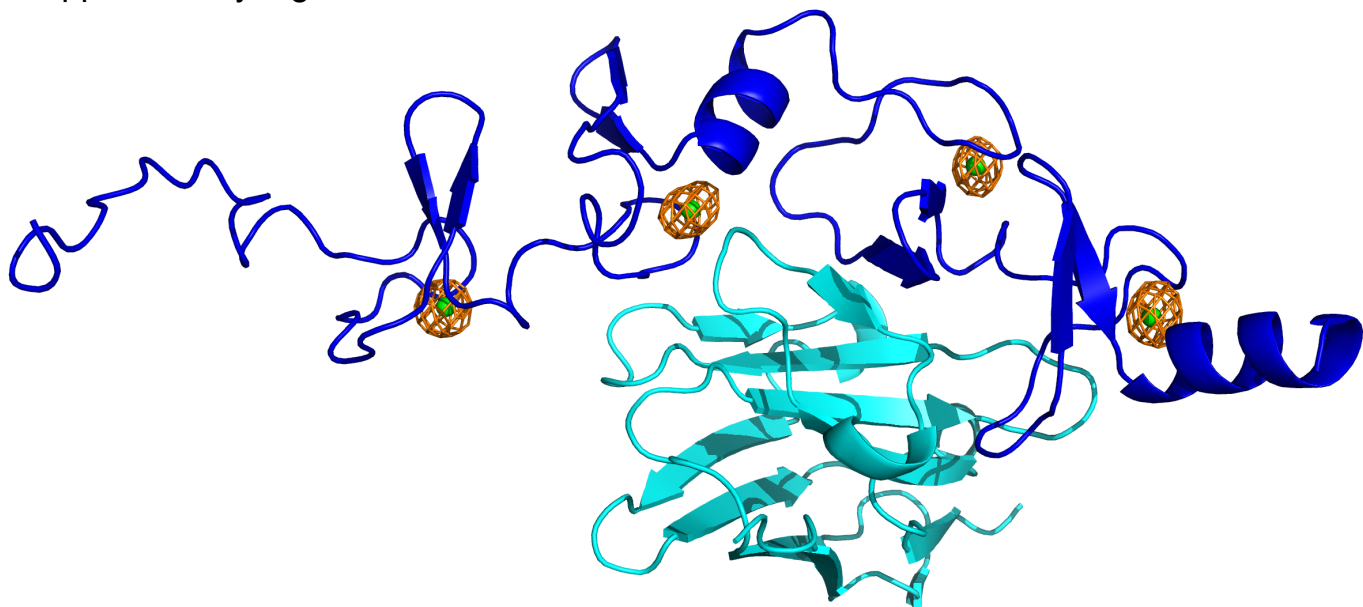

### **An anomalous difference map positioning zinc atoms in the LMO2-VH complex**

An anomalous difference Fourier map contoured at  $4.0\sigma$  (orange mesh) is shown to highlight the positions of the zinc ions (green spheres). The map was calculated using the peak wavelength anomalous differences and phases after refinement with all zinc ions omitted. LMO2 and VH#576 are coloured in blue and cyan respectively.

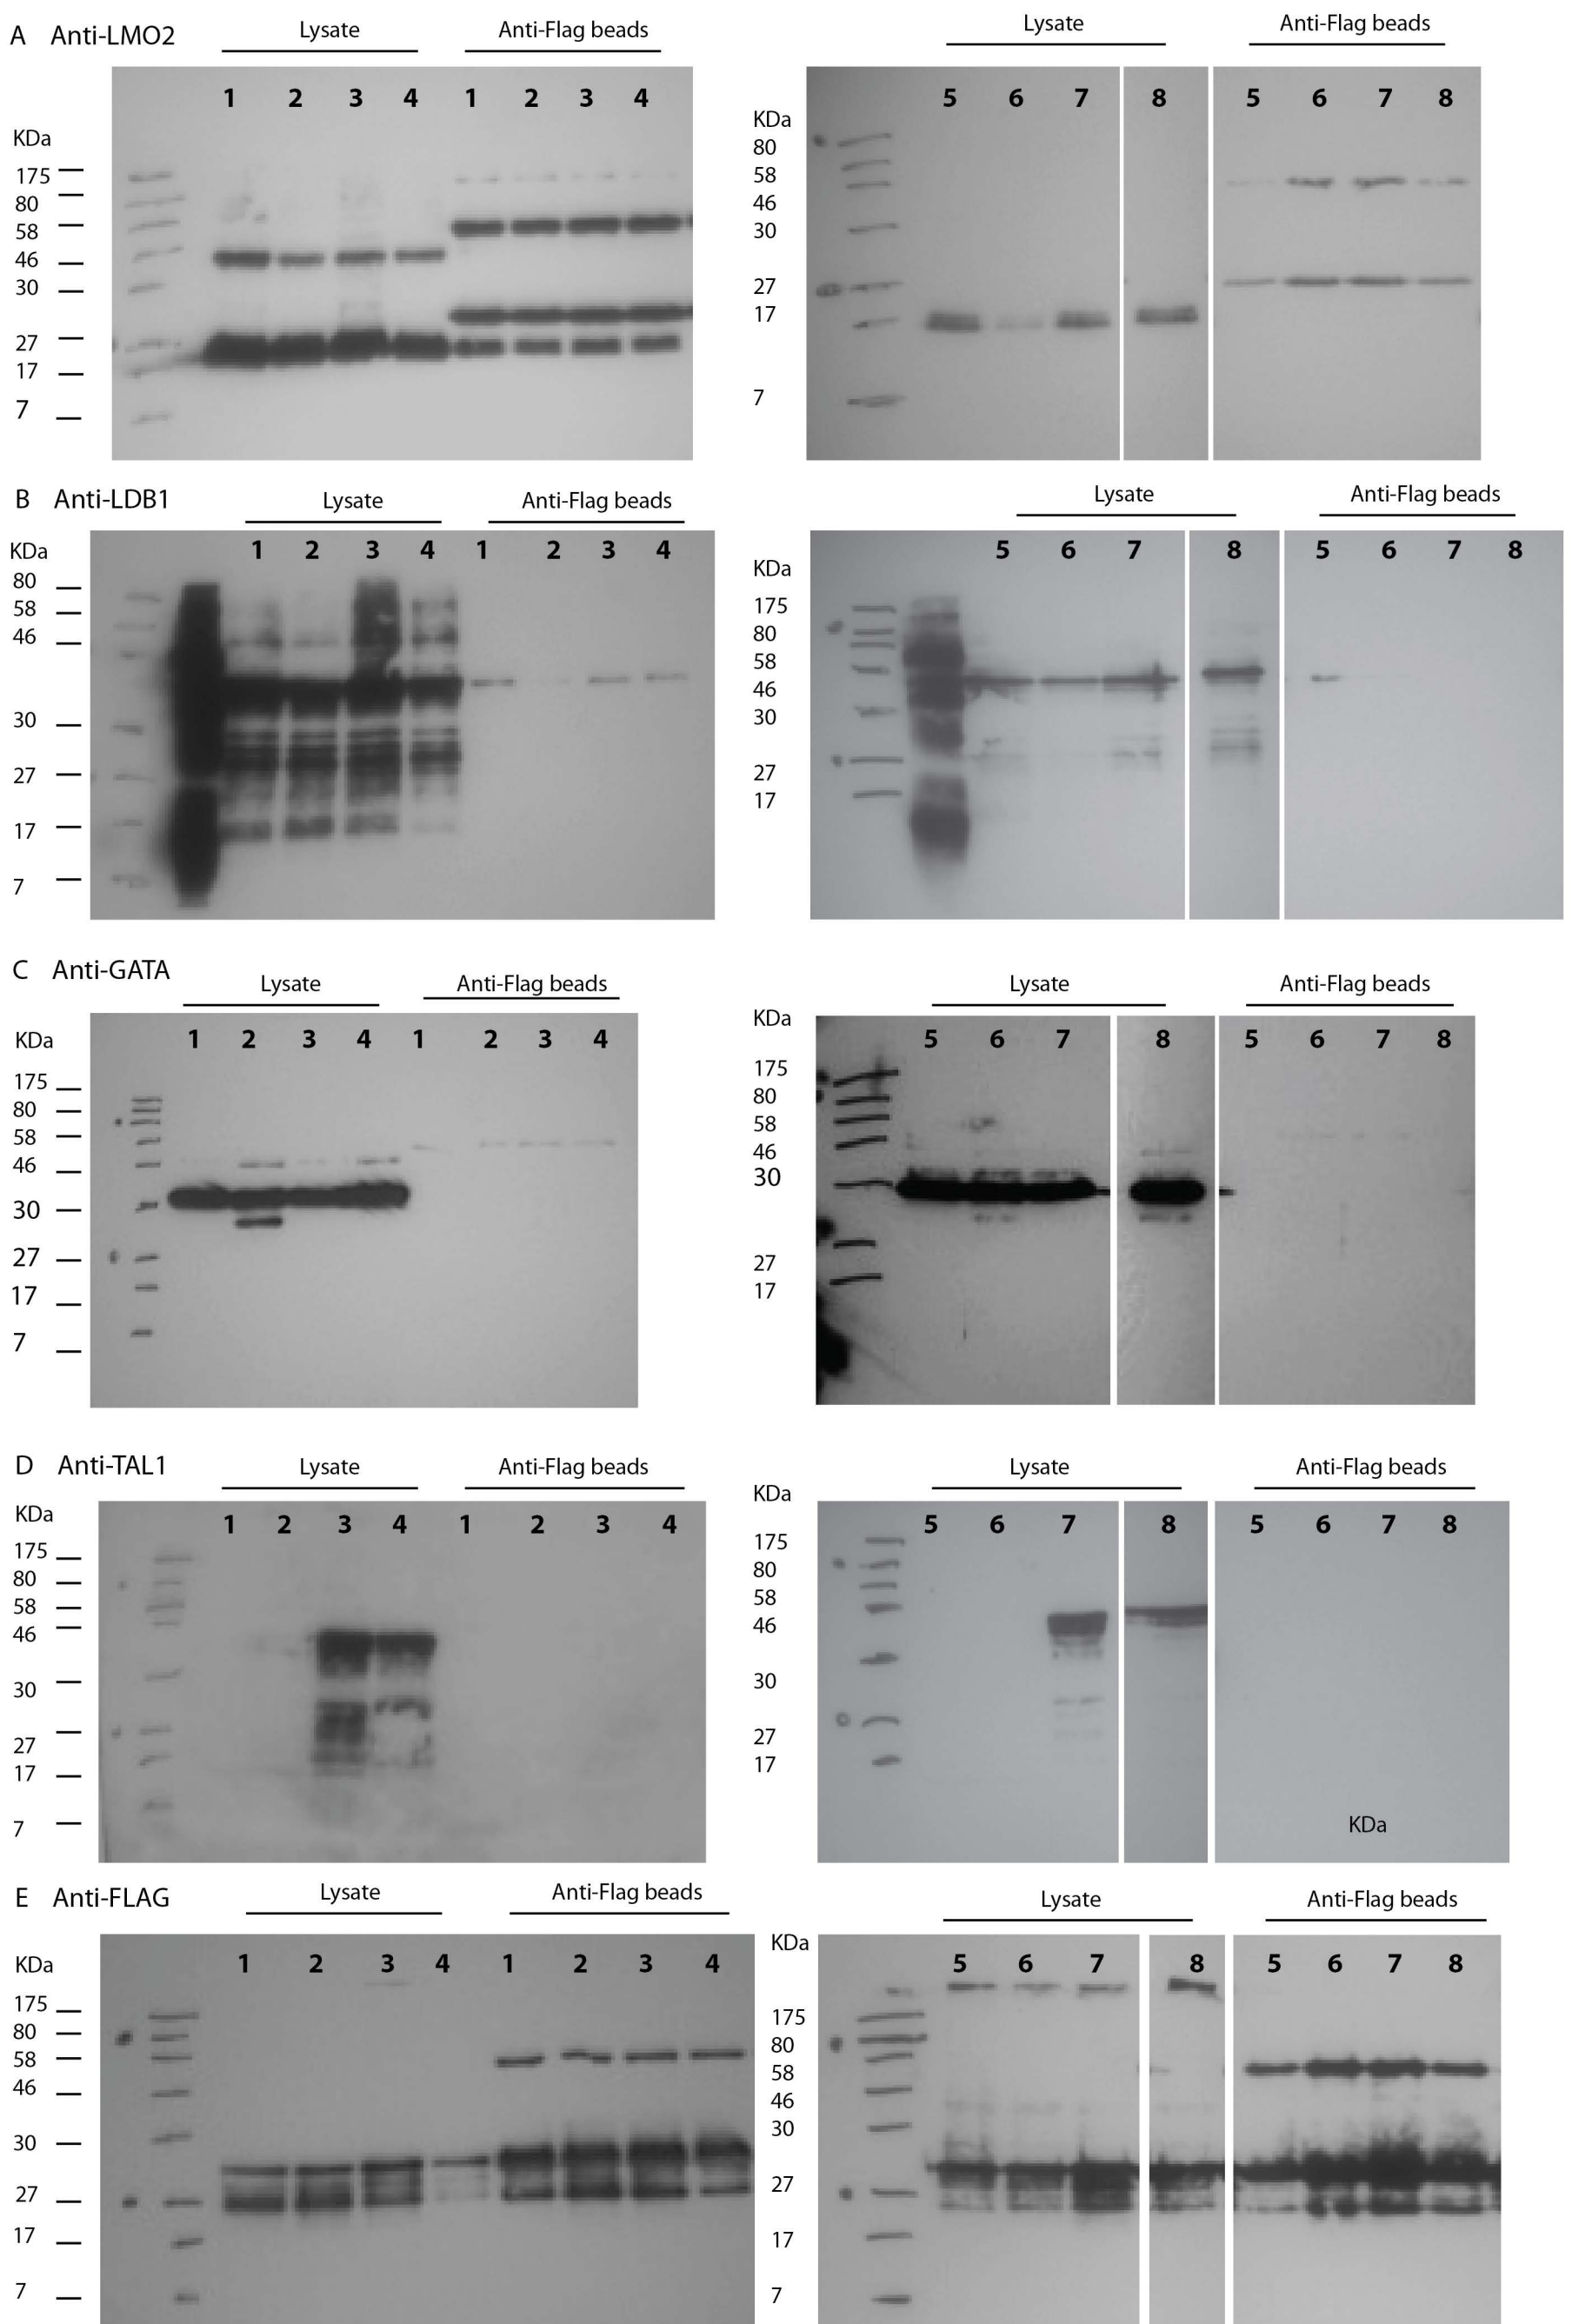

Lane key:

| Transfection                         | 1 | 2 | 3 | 4 | 5 | 6 | 7 | 8 |
|--------------------------------------|---|---|---|---|---|---|---|---|
| pGL3-E1bLUC-(Ebox-GATA) <sub>2</sub> | + | + | + | + | + | + | + | + |
| Ldb1/Lmo2                            | + | + | + | + | + | + | + | + |
| GATA-1                               | - | + | - | + | - | + | - | + |
| TAL1/E2A                             | - | - | + | + | - | - | + | + |
| 3XFlag-VH576-NLS                     | + | + | + | + | - | - | - | - |
| 3XFlag-VHY6-NLS                      | - | - | - | - | + | + | + | + |

**Figure 5: Expanded data for figure 4C, Western blotting of pull-down proteins.** COS-7 cells were co-transfected various combinations of plasmids coding for LMO2, LDB1, TAL1, E47 and GATA-1 and either Flag-tagged VH#576 or Flag-tagged VH#6 (a non-relevant VH) as shown in the inset table. Protein complexes were isolated with anti-Flag antibody beads and purified proteins separated by SDS-PAGE. The presence of LMO2 (A), LDB1 (B), GATA-1 (C), TAL1 (D) Flag tagged VH (E) was detected in both the lysate and pull down material by Western blotting. Bands from lanes 4 and 8 are shown in figure 4C.

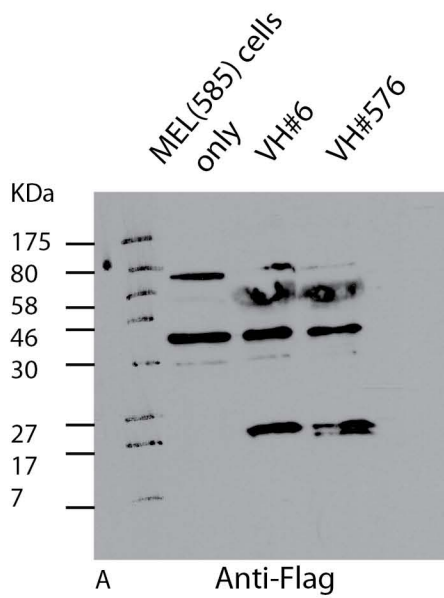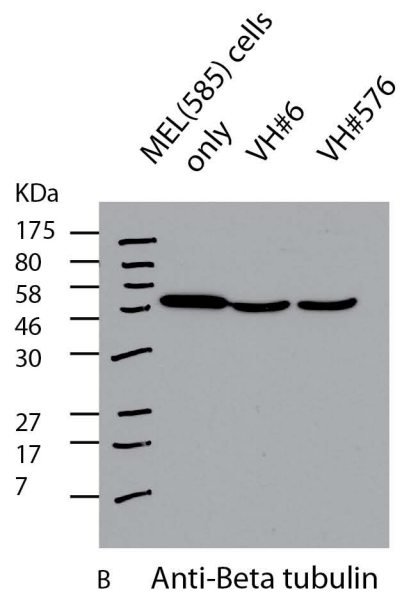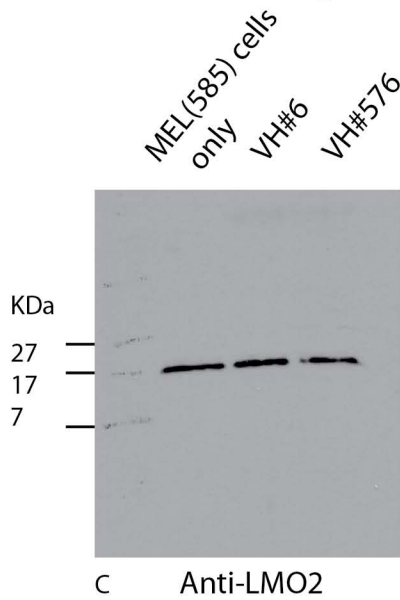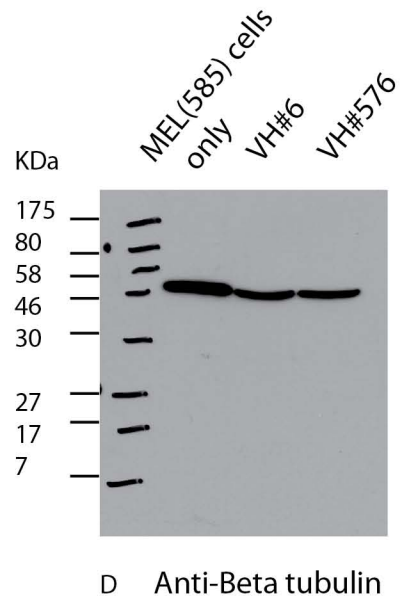

**Figure 6: Expanded data for figure 4D, the effect on protein stability of binding VH#576 to LMO2.**

Extracts from MEL585 cells expressing VH#576 (anti-LMO2) or VH#6 (anti-RAS) or untransfected were separated by SDS-PAGE and transferred to membrane for Western analysis with anti-flag mouse monoclonal antibody (A) and anti-tubulin (as a protein loading control) (B); or anti-LMO2 monoclonal antibody (AbD Serotec) (C) and anti-tubulin (D).
